# Supplementary material for: Effects on Serum Hormone Concentrations after a Dietary Phytoestrogen Intervention in Patients with Prostate Cancer: A Randomized Controlled Trial
Source: MDPI journal article supplement (doi:10.3390/nu15071792), 2023-04-06
Supplement: s1 [file s1]

## Supplementary Materials

**Supplemental Table S1.** Plasma concentrations of phytoestrogens in the intervention group receiving crushed or whole flaxseeds in the PRODICA <sup>1</sup> study

|                             | Crushed flaxseeds ( <i>n</i> = 7) |              | Whole flaxseeds ( <i>n</i> = 44) |               |          |
|-----------------------------|-----------------------------------|--------------|----------------------------------|---------------|----------|
| Plasma concentrations       | Median                            | Range        | Median                           | Range         | <i>P</i> |
| (nmol/L)                    | (IQR)                             |              | (IQR)                            |               |          |
| <b>Secoisolariciresinol</b> |                                   |              |                                  |               |          |
| Baseline                    | 7.5 (9.0)                         | 1.3-14.8     | 6.0 (5.6)                        | 0.6-103.1     | 1.000    |
| Endpoint                    | 36.7 (39.0)                       | 7.8-80.8     | 11.5 (17.2)                      | 1.2-108.3     | 0.0552   |
| Change <sup>2</sup>         | 25.4 (32.7)                       | 1.0.2-78.4   | 4.2 (12.7)                       | -90.3-98.5    | 0.0342   |
| <b>Enterodiol</b>           |                                   |              |                                  |               |          |
| Baseline                    | 5.6 (19.0)                        | 1.1-1584.5   | 5.9 (11.4)                       | 0.6-122.0     | 0.989    |
| Endpoint                    | 29.2 (98.6)                       | 5.4-253.8    | 30.0 (58.1)                      | 1.2-1526.1    | 0.943    |
| Change <sup>2</sup>         | 9.1 (105.7)                       | -330.8-100.5 | 16.6 (53.6)                      | -87.9-1501.2  | 0.412    |
| <b>Enterolactone</b>        |                                   |              |                                  |               |          |
| Baseline                    | 117.2 (205.3)                     | 46.6-321.8   | 87.4 (113.0)                     | 5.2-348.7     | 0.253    |
| Endpoint                    | 438.6 (771.4)                     | 66.9-1042.6  | 204.0 (368.2)                    | 0.8-1348.2    | 0.312    |
| Change <sup>2</sup>         | 116.8 (718.0)                     | 6.1-779.3    | 102.0 (355.2)                    | -218.2-1264.5 | 0.299    |

<sup>1</sup> The impact of DIet and individual genetic factors on tumor proliferation rate in men with PROstate CAncer.

<sup>2</sup> The median difference between endpoint and baseline.

The Mann-Whitney U test was used to compare groups.
